# Supplementary material for: Optical O2 Sensors Also Respond to Redox Active Molecules Commonly Secreted by Bacteria
Source: PubMed Central journal article supplement (PMC9765510; doi:10.1128/mbio.02076-22), 2022-10-31

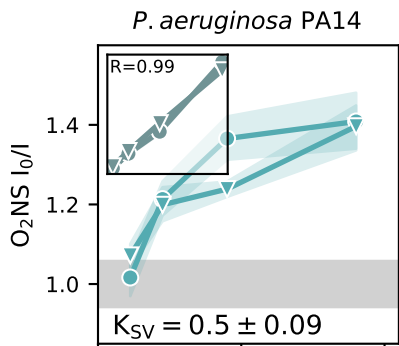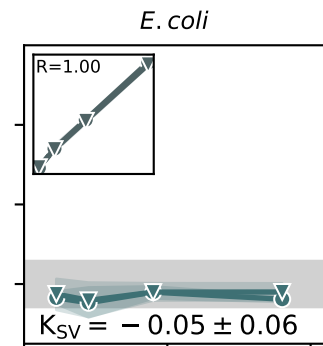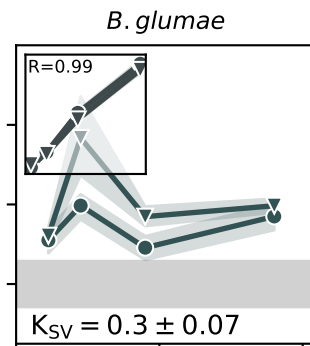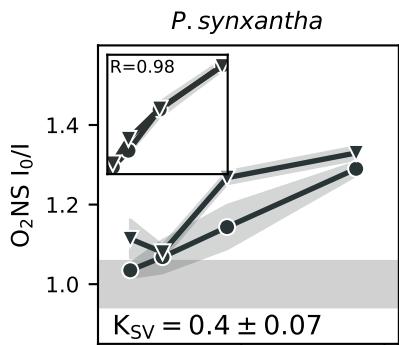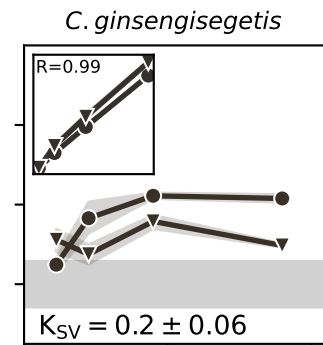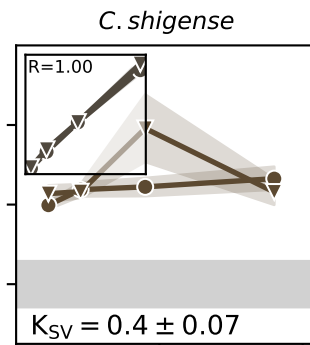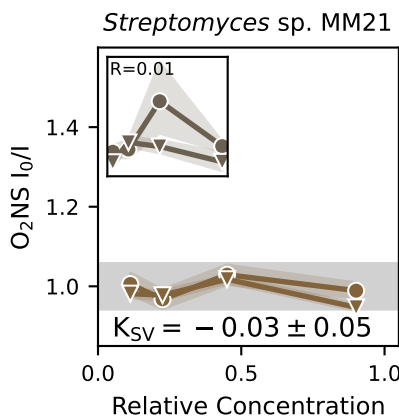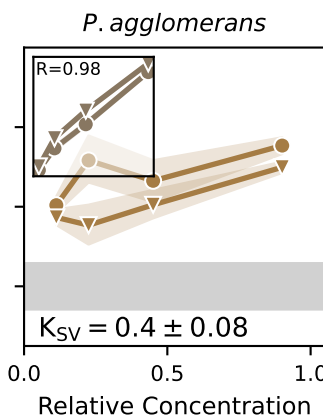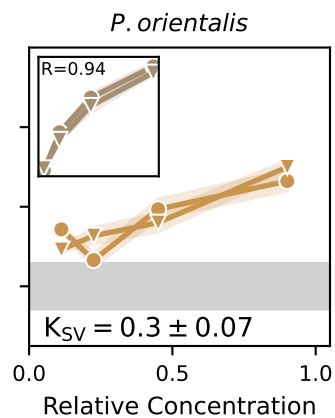

Supplement: mbio.02076-22-s0001.pdf [file mbio.02076-22-s0001.pdf]
